# Supplementary material for: Analysis of the quality of seasonal malaria chemoprevention provided by community health Workers in Boulsa health district, Burkina Faso
Source: Springer Nature journal article supplement (doi:10.1186/s12913-019-4299-3), 2019-07-10
Supplement: MOESM3 [file 16917422]

**Questionnaire\_ Satisfaction of child caregivers**

|     |                                                                                                |                                                                                                                                                 |
|-----|------------------------------------------------------------------------------------------------|-------------------------------------------------------------------------------------------------------------------------------------------------|
| A1  | Date                                                                                           | /____/____/____                                                                                                                                 |
| A2  | District                                                                                       |                                                                                                                                                 |
| A3  | Health centre                                                                                  |                                                                                                                                                 |
| A4  | Village                                                                                        |                                                                                                                                                 |
| A5  | Child caregiver's name                                                                         |                                                                                                                                                 |
| A6  | Sex                                                                                            | (1) Male<br>(2) Female                                                                                                                          |
| A7  | Age                                                                                            | /_____                                                                                                                                          |
| A8  | Schooling level                                                                                | (1) Unschooler<br>(2) Literate( local language)<br>(3) Primary school<br>(4) Secondary school<br>(5) University                                 |
| A9  | Relationship to child                                                                          | (1) Biological mother<br>(2) Father<br>(3) Co-wife<br>(4) Grand-mother<br>(5) Grand-father<br>(6) Daughter/ son<br>(7) Other ( to specify)/____ |
| A10 | Inquirer's name                                                                                |                                                                                                                                                 |
| A11 | Have the CHWs come to your home?                                                               | (1) Yes<br>(2) No                                                                                                                               |
| A12 | Has the child got medicine from the SMC?                                                       | (1) Yes<br>(2) No                                                                                                                               |
| A13 | Have the CHWs administered medicine to your child themselves?                                  | (1) Yes<br>(2) No                                                                                                                               |
| A14 | Have the CHWs given you other medicine for the child?                                          | (1) Yes<br>(2) No                                                                                                                               |
| A15 | Have the CHWs told you when and how to give these medicine to the child?                       | (1) Yes<br>(2) No                                                                                                                               |
| A16 | Are you satisfied with the atmosphere of trust between you and the CHWs when they come to you? | (1) Yes<br>(2) No                                                                                                                               |
| A17 | Are you satisfied with the CHWs' behaviour when they come to you?                              | (1) Yes<br>(2) No                                                                                                                               |
| A18 | You satisfied with the availability of medicine?                                               | (1) Yes<br>(2) No                                                                                                                               |

|     |                                                             |                   |
|-----|-------------------------------------------------------------|-------------------|
| A19 | Are you satisfied with the care provided to your child?     | (1) Yes<br>(2) No |
| A20 | Are there some aspects that you want to make remarks about? | (1) Yes<br>(2) No |
