# Supplementary material for: Analysis of the quality of seasonal malaria chemoprevention provided by community health Workers in Boulsa health district, Burkina Faso
Source: Springer Nature journal article supplement (doi:10.1186/s12913-019-4299-3), 2019-07-10
Supplement: MOESM4 [file 16917422]

**Questionnaire\_Socio-demographic characteristics of CHWs**

|     |                  |       |
|-----|------------------|-------|
| B01 | Date             |       |
| B02 | District         |       |
| B03 | health centre    |       |
| B04 | Village          |       |
| B05 | Names of the CHW | _____ |
| B06 | Inquirer's name  | _____ |

**SOCIO-DEMOGRAPHIC CHARACTERISTICS**

|     |                                                             |                                                                                                                       |
|-----|-------------------------------------------------------------|-----------------------------------------------------------------------------------------------------------------------|
| B07 | How old were you on your last birthday?                     | /_____/_____/                                                                                                         |
| B08 | Sex                                                         | (1) Male<br>(2) Female                                                                                                |
| B09 | What is your marital status?                                | (1) Married/ in union<br>(2) Single<br>(3) Separated/ divorced<br>(4) Widower/ widow<br>(5) Other ( to specify)/_____ |
| B10 | Where do you live?                                          | (1) In this village<br>(2) Another village                                                                            |
| B11 | What is your schooling level?                               | (1) Unschooler<br>(2) Literate( local language)<br>(3) Primary school<br>(4) Secondary school<br>(5) University       |
| B12 | What is your main occupation?                               | (1) Farmer<br>(2) Stockbreeder/ poultry raiser<br>(3) Trader<br>(4) Student<br>(5) Other ( to specify)                |
| B13 | Have you ever worked as an CHW?                             | (1) Yes<br>(2) No ( if <i>no</i> , Skip to question B15)                                                              |
| B14 | How many years of experience do you have as an CHW?         | /_____                                                                                                                |
| B15 | How many SMC programmes have you already partaken as an CD? | /_____                                                                                                                |
| B16 | Have you received any training in SMC this year?            | (1) Yes<br>(2) No                                                                                                     |
